# Supplementary material for: Effect of Xpert MTB/RIF on clinical outcomes in routine care settings: individual patient data meta-analysis
Source: PubMed Central journal article supplement (PMC6366854; doi:10.1016/s2214-109x(18)30458-3), 2019-02
Supplement: NIHMS1519364-supplement-1.pdf [file NIHMS1519364-supplement-1.pdf]

# THE LANCET

## Global Health

### Supplementary appendix

This appendix formed part of the original submission and has been peer reviewed.  
We post it as supplied by the authors.

Supplement to: Di Tanna GL, Khaki AR, Theron G, et al. Effect of Xpert MTB/RIF on clinical outcomes in routine care settings: individual patient data meta-analysis. *Lancet Glob Health* 2019; **7**: e191–99.

## Appendix

Figure S1. Risk of bias assessment

|                               | Random sequence generation (selection bias) | Allocation concealment (selection bias) | Blinding of participants and personnel (performance bias) | Blinding of outcome assessment (detection bias) | Incomplete outcome data (attrition bias) | Selective reporting (reporting bias) | Other bias |
|-------------------------------|---------------------------------------------|-----------------------------------------|-----------------------------------------------------------|-------------------------------------------------|------------------------------------------|--------------------------------------|------------|
| Cox et al.                    | +                                           | -                                       | -                                                         | +                                               | ?                                        | -                                    | +          |
| Durovni et al, Trajman et al. | +                                           | -                                       | -                                                         | +                                               | +                                        | -                                    | +          |
| Mupfumi et al                 | +                                           | +                                       | -                                                         | +                                               | +                                        | +                                    | +          |
| TB-NEAT                       | +                                           | +                                       | -                                                         | +                                               | +                                        | +                                    | +          |
| XTEND                         | +                                           | +                                       | -                                                         | +                                               | +                                        | +                                    | +          |

**Table S1. Sensitivity analyses employing random effects and additional covariate adjustment**

| Adults investigated for TB                                          | Studies*        | Number of adults        | OR/HR        | 95% CI        |       | p (test of effect)        | I <sup>2</sup>       | p (test of homogeneity)        |
|---------------------------------------------------------------------|-----------------|-------------------------|--------------|---------------|-------|---------------------------|----------------------|--------------------------------|
| <b>6-month mortality risk <sup>†</sup></b>                          |                 |                         |              |               |       |                           |                      |                                |
| HIV-positive                                                        | [15, 17, 18]    | 4,066                   | 0.83         | 0.64          | 1.08  | 0.24                      | 14.8%                | 0.31                           |
| <b>Time to death</b>                                                |                 |                         |              |               |       |                           |                      |                                |
| Overall, adjusted for age, gender, weight, TB symptoms              | [15, 16, 18]    | 6,568                   | 0.84         | 0.65          | 1.09  | 0.20                      | 0.00%                | 0.41                           |
| HIV-positive, adjusted for age, gender, weight, TB symptoms         | [15, 16, 18]    | 3,511                   | 0.73         | 0.56          | 0.96  | 0.02                      | 0.00%                | 0.64                           |
| <b>Time to TB diagnosis</b>                                         |                 |                         |              |               |       |                           |                      |                                |
| Overall                                                             | [15, 16]        | 1,924                   | 0.992        | 0.763         | 1.290 | 0.953                     | 47.50%               | 0.167                          |
| HIV-positive                                                        | [15, 16]        | 1,317                   | 0.977        | 0.790         | 1.208 | 0.827                     | 25.20%               | 0.248                          |
| <b>3-month mortality risk</b>                                       |                 |                         |              |               |       |                           |                      |                                |
| Overall, adjusted for age, gender, weight, TB symptoms <sup>§</sup> | [15, 16, 18]    | 6, 225                  | 0.90         | 0.66          | 1.21  | 0.50                      | 9.3%                 | 0.33                           |
| Overall, adjusted for age, gender, weight, TB symptoms              | [15, 16, 18]    | 6, 225                  | 0.89         | 0.64          | 1.23  | 0.46                      | 9.3%                 | 0.33                           |
| <b>Time to TB treatment</b>                                         |                 |                         |              |               |       |                           |                      |                                |
| Overall, adjusted for age, gender, weight, TB symptoms <sup>§</sup> | [15, 16, 18]    | 6,287                   | 0.90         | 0.78          | 1.02  | 0.10                      | 58.10%               | 0.09                           |
| Overall, adjusted for age, gender, weight, TB symptoms              | [15, 16, 18]    | 6,287                   | 0.89         | 0.71          | 1.12  | 0.32                      | 58.10%               | 0.09                           |
| <b>Adults initiated on TB treatment</b>                             | <b>Studies*</b> | <b>Number of adults</b> | <b>OR/HR</b> | <b>95% CI</b> |       | <b>p (test of effect)</b> | <b>I<sup>2</sup></b> | <b>p (test of homogeneity)</b> |
| <b>Time to death</b>                                                |                 |                         |              |               |       |                           |                      |                                |

|              |                      |       |      |      |      |      |        |      |
|--------------|----------------------|-------|------|------|------|------|--------|------|
| HIV-positive | [15, 16, 17, 18, 19] | 1,445 | 0.85 | 0.52 | 1.39 | 0.46 | 18.00% | 0.30 |
|--------------|----------------------|-------|------|------|------|------|--------|------|

All estimates are adjusted for age and gender (unless additional covariates noted), and were combined using random effects regardless of heterogeneity ( $I^2$ ) estimate (unless fixed effects are noted).

\* References refer to the primary studies: [15] TB-NEAT; [16] Mupfumi et al.; [17] Cox et al.; [18] XTEND; [19] Durovni et al

† 6-month mortality risk was the primary outcome.

§ Analysed using fixed effects.

*Definition of Abbreviations:* OR, odds ratio; HR, hazard ratio; CI, confidence interval.

**Table S2. Sensitivity analyses using the one-stage approach**

| Adults investigated for TB                                  | Studies*         | Number of adults | OR/HR | 95% CI |      | p (test of effect) |
|-------------------------------------------------------------|------------------|------------------|-------|--------|------|--------------------|
| <b>6-month mortality risk †</b>                             |                  |                  |       |        |      |                    |
| Overall                                                     | [15, 17, 18]     | 8,142            | 0.89  | 0.70   | 1.13 | 0.34               |
| HIV negative                                                | [15, 17, 18]     | 2,538            | 0.80  | 0.47   | 1.35 | 0.40               |
| HIV positive                                                | [15, 17, 18]     | 4,066            | 0.83  | 0.63   | 1.1  | 0.2                |
| <b>Time to Death</b>                                        |                  |                  |       |        |      |                    |
| Overall                                                     | [15, 16, 17, 18] | 8,561            | 0.86  | 0.68   | 1.09 | 0.22               |
| Overall, adjusted for age, gender, weight, TB symptoms      | [15, 16, 18]     | 6,568            | 0.86  | 0.661  | 1.11 | 0.24               |
| HIV negative                                                | [15, 17, 18]     | 2,583            | 0.80  | 0.48   | 1.35 | 0.41               |
| HIV positive                                                | [15, 16, 17, 18] | 4,486            | 0.81  | 0.63   | 1.05 | 0.11               |
| HIV positive, adjusted for age, gender, weight, TB symptoms | [15, 16, 18]     | 3,511            | 0.76  | 0.57   | 1.01 | 0.06               |
| No history of prior TB                                      | [15, 16, 17, 18] | 6,887            | 0.90  | 0.69   | 1.16 | 0.40               |
| History of prior TB                                         | [15, 16, 17, 18] | 1,674            | 0.75  | 0.47   | 1.20 | 0.06               |
| <b>3-month mortality risk</b>                               |                  |                  |       |        |      |                    |
| Overall                                                     | [15, 16, 17, 18] | 8,566            | 0.92  | 0.71   | 1.20 | 0.53               |
| Overall, adjusted for age, gender, weight, TB symptoms      | [15, 16, 18]     | 6,572            | 0.90  | 0.68   | 1.19 | 0.46               |
| HIV negative                                                | [15, 17, 18]     | 2,583            | 0.76  | 0.43   | 1.35 | 0.35               |
| HIV positive                                                | [15, 16, 17, 18] | 4,490            | 0.87  | 0.65   | 1.16 | 0.33               |
| No history of prior TB                                      | [15, 16, 17, 18] | 6,891            | 1.02  | 0.77   | 1.37 | 0.88               |
| History of prior TB                                         | [15, 16, 17, 18] | 1,675            | 0.59  | 0.34   | 1.02 | 0.06               |
| <b>Time to TB diagnosis</b>                                 |                  |                  |       |        |      |                    |
| Overall                                                     | [15, 16]         | 1,924            | 1.03  | 0.87   | 1.22 | 0.73               |

|                                                        |                  |       |      |      |      |      |
|--------------------------------------------------------|------------------|-------|------|------|------|------|
| HIV positive                                           | [15, 16]         | 1,317 | 0.98 | 0.80 | 1.20 | 0.87 |
| <b>Time to TB treatment</b>                            |                  |       |      |      |      |      |
| Overall                                                | [15, 16, 17, 18] | 8,208 | 1.04 | 0.91 | 1.17 | 0.60 |
| Overall, adjusted for age, gender, weight, TB symptoms | [15, 16, 18]     | 6,287 | 0.84 | 0.70 | 0.99 | 0.04 |
| HIV negative                                           | [15, 17, 18]     | 2,482 | 0.86 | 0.67 | 1.09 | 0.21 |
| HIV positive                                           | [15, 16, 17, 18] | 4,251 | 1.07 | 0.92 | 1.25 | 0.39 |
| No history of prior TB                                 | [15, 16, 17, 18] | 6,666 | 0.86 | 0.71 | 1.03 | 0.10 |
| History of prior TB                                    | [15, 16, 17, 18] | 1,542 | 0.79 | 0.53 | 1.16 | 0.22 |

All pooled estimates are adjusted for age and gender, and are reported using a one-stage analytic approach.

\* References refer to the primary studies: [15] TB-NEAT; [16] Mupfumi et al.; [17] Cox et al.; [18] XTEND; [19] Durovni et al

† 6-month mortality risk was the primary outcome.

*Definition of Abbreviations:* OR, odds ratio; HR, hazard ratio; CI, confidence interval.

**Table S3. Summary of the trials contributing to the primary and secondary outcomes**

|                                         | <b>Theron et al. (TB-NEAT) <sup>15</sup></b> | <b>Mupfumi et al. <sup>16</sup> *</b> | <b>Cox et al. <sup>17</sup></b> | <b>Churchyard et al. (XTEND) <sup>18</sup></b> | <b>Durovni et al., Trajman et al. <sup>19,22</sup></b> |
|-----------------------------------------|----------------------------------------------|---------------------------------------|---------------------------------|------------------------------------------------|--------------------------------------------------------|
| <b>Adults investigated for TB</b>       |                                              |                                       |                                 |                                                |                                                        |
| 6-month mortality risk                  | X                                            |                                       | X                               | X                                              |                                                        |
| Time to death                           | X                                            | X                                     | X                               | X                                              |                                                        |
| 3-month mortality risk                  | X                                            | X                                     | X                               | X                                              |                                                        |
| Time to TB diagnosis                    | X                                            | X                                     |                                 |                                                |                                                        |
| Time to starting TB treatment           | X                                            | X                                     | X                               | X                                              |                                                        |
| <b>Adults initiated on TB treatment</b> |                                              |                                       |                                 |                                                |                                                        |
| Time to death                           | X                                            | X                                     | X                               | X                                              | X                                                      |

\* Contributed HIV-positive adults only.
